# Supplementary material
Source: PubMed Central journal article supplement (PMC5916760)
Supplement: NIHMS900721-supplement-supplement_1.pdf [file NIHMS900721-supplement-supplement_1.pdf]

380 **SUPPLEMENTARY DOCUMENT: STUDY PROTOCOL**

381 **TITLE:** Racial and ethnic disparities in healthcare utilization for eczema

382

383 **AIM:** To investigate the association between race/ethnicity and healthcare utilization (i.e.,  
384 ambulatory visits, emergency visits, prescriptions filled) for eczema.

385

386 **HYPOTHESIS:** Healthcare utilization for eczema differs by race/ethnicity.

387

388 **SIGNIFICANCE:**

389 Differences in the prevalence of common dermatologic disorders, including eczema, have been  
390 identified according to race/ethnicity. While the association between race/ethnicity and  
391 healthcare utilization is amassing, studies examining multiple healthcare utilization outcomes  
392 with adequate granularity in the context of dermatologic conditions are limited. Identification of  
393 disparities in healthcare utilization can help identify subpopulations that could benefit from  
394 specific allocation of education, social, and financial resources with respect to common  
395 dermatologic conditions.

396

397 **INNOVATION:** Few studies have examined healthcare utilization for eczema according to  
398 race/ethnicity. This study is intended to add to the literature in this understudied research area.

399

400 **STUDY DESIGN:** The Medical Expenditure Panel Surveys are a series of surveys with

401 longitudinal design consisting of two years of follow-up. The studies are large-scale United  
402 States national surveys conducted from 1996-2013 of families and individuals, their medical  
403 providers, and employers. Individuals included in these studies are a nationally representative  
404 subsample of households from the previous year's National Health Interview Survey (National  
405 Center for Health Statistics). The survey uses a complex design, which includes a stratified  
406 multistage probability design with overlapping panels to collect detailed information for each  
407 participant's demographic and socioeconomic characteristics, health status and conditions,  
408 medical services usage, charges and source of payments, insurance coverage, income, and  
409 employment. We will perform a cohort using data pooled from the serial longitudinal cohorts.

410

411 **SOURCE POPULATION:** Data will be obtained from the Medical Expenditure Panel Survey,  
412 which is the most complete source of data on the cost and use of health care and health insurance  
413 coverage in the United States. These data are publicly available through the Agency for  
414 Healthcare Research and Quality.

415

416 Exposed groups will be defined as follows:

- 417 - Individuals with ICD9 code 691-692 (i.e., atopic dermatitis/contact dermatitis/other  
418 eczema) AND
- 419 - Individuals who are of racial/ethnic minority status (i.e., Hispanic, non-Hispanic black,  
420 non-Hispanic Asian/Pacific Islander, non-Hispanic Native American or Alaskan/Aleutian  
421 Native, and other non-Hispanic non-white race/ethnicity) AND
- 422 - Individuals between the ages of 0 and 17

423

424 Unexposed group will be defined by all of the following:

425 - Individuals with ICD9 code 691-692 (i.e., atopic dermatitis/contact dermatitis/other  
426 eczema) AND

427 - Individuals who are non-Hispanic white AND

428 - Individuals between the ages of 0 and 17

429

430 Patients with incomplete follow-up information and thus missing information on population-  
431 based longitudinal weights will be excluded from analyses. Patients without eczema will be  
432 included as a separate subpopulation when conducting survey analyses to ensure accurate  
433 calculation of variance estimation.

434

435 **EXPOSURE VARIABLE:** The exposure of interest will be minority race/ethnicity compared  
436 with non-Hispanic white. Minority race/ethnicities include:

437 a. Hispanic white

438 b. Non-Hispanic black

439 c. Non-Hispanic Asian/Pacific Islander

440 d. Non-Hispanic Native American or Alaskan/Aleutian Native

441 e. Other non-Hispanic non-white race/ethnicity

442

443 **OUTCOME VARIABLE:** The primary outcomes will be healthcare utilization as defined by

444 the following within the two-year follow-up period

445 a. Any ambulatory visits associated with eczema

446 b. Dermatology ambulatory visits associated with eczema

447 c. Emergency visits associated with eczema

448 d. Prescription fills associated with eczema

449

450 **COVARIATES/POTENTIAL CONFOUNDERS:** We will examine possible confounding and  
451 effect modification by factors known to be associated with healthcare utilization. The variables  
452 that we will consider exploring in our multivariable statistical models include but are not limited  
453 to the following: age, sex, region of residence, measures of socioeconomic status, household  
454 income, employment status, health insurance status, atopic comorbidities. Care will be taken to  
455 distinguish confounders from mediators, and only confounders will be adjusted for.

456

457 **STATISTICAL ANALYSIS:**

458 We will first perform descriptive statistics to summarize demographic information (e.g., age, sex,  
459 region of residence, measures of socioeconomic status, household income, employment status,  
460 health insurance status, atopic comorbidities) according to race/ethnicity. The global F-test from  
461 simple linear regression will be used for continuous variables; the Rao-Scott design-based chi-  
462 squared test will be used for categorical variables. We will use logistic regression to determine  
463 the unadjusted and adjusted associations between race/ethnicity and dichotomous measures of  
464 healthcare utilization for each of the dermatologic conditions of interest. The measure of  
465 association will be odds ratios. We will use negative binomial or Poisson regression to determine

466 the unadjusted and adjusted associations between race/ethnicity and continuous measures of  
467 healthcare utilization. The measure of association will be incidence rate ratios. In building a  
468 multivariable statistical model, we will use all of the aforementioned potential confounding  
469 variables in the model and then use a backward selection approach to reach a parsimonious  
470 model and will remove any covariates from the model that are not statistically significant and  
471 also do not change the point estimate of the exposure variable by more than 10%. All statistical  
472 analyses will take into account the complex multi-stage sampling design to ensure appropriate  
473 variance estimates as well as the population-based weights to ensure that the results are  
474 generalizable to the United States population distribution.

475

476 **POTENTIAL BIAS:** Biases that may be introduced in our study include information bias (e.g.,  
477 recall and reporting biases), which may result from misclassification of the exposure and/or  
478 outcome. Furthermore, despite adjusting for covariates, residual confounding may exist and  
479 introduce bias due to presence of unmeasured confounders.

480

481 **GENERALIZABILITY:** The Medical Expenditure Panel Survey data being used is highly  
482 representative of the United States civilian non-institutionalized population, and is the most  
483 complete source of data on the cost and use of health care and health insurance coverage in the  
484 United States. Thus, our results will be generalizable to this large population.
